# Supplementary material for: Protonated mesoporous graphitic carbon nitride for rapid and highly efficient removal of microcystins
Source: Royal Society of Chemistry journal article supplement (doi:10.1039/c5ra01415h), 2015-01-01
Supplement: c5ra01415h1.pdf [file c5ra01415h1.pdf]

## Supplementary Data

### **Protonated mesoporous graphitic carbon nitride for rapid and high efficient removal of microcystins**

**Chuanhui Huang<sup>a</sup>, Wenmin Zhang<sup>a</sup>, Zhiming Yan<sup>a</sup>, Jia Gao<sup>a</sup>, Wei Liu<sup>a,b</sup>, Ping Tong<sup>a,b</sup>\*, Lan Zhang<sup>a,b</sup>\***

<sup>a</sup> Ministry of Education Key Laboratory of Analysis and Detection for Food Safety, Fujian Provincial Key Laboratory of Analysis and Detection Technology for Food Safety, College of Chemistry, Fuzhou University, Fuzhou, Fujian, 350116, China

<sup>b</sup> Testing Center, The Sport Science Research Center, Fuzhou University, Fuzhou, Fujian, 350002, China

- **Corresponding author:** Lan Zhang
  - **Postal address:** College of Chemistry, Fuzhou University,  
Fuzhou, Fujian, 350116, China
  - **Tel:** 86-591-22866135
  - **Fax:** 86-591-22866135
- E-mail:** zlan@fzu.edu.cn (L. Zhang)

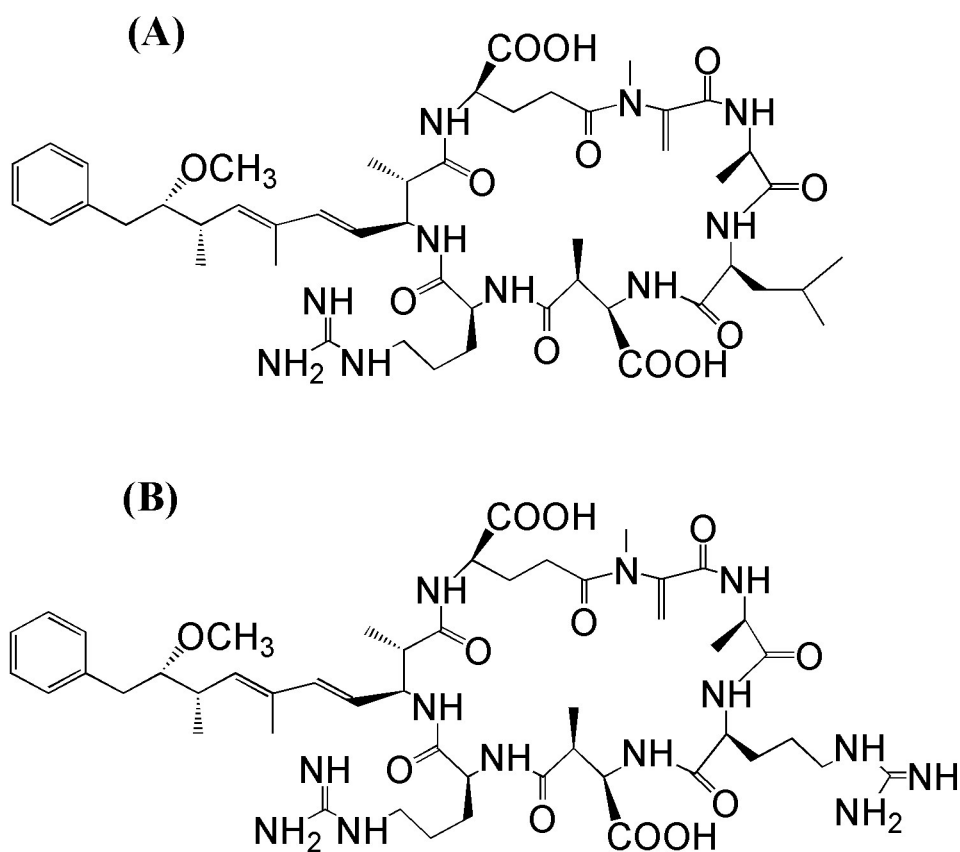

Fig. S1. Chemical structure of microcystins; (A) MC-LR; (B) MC-RR.

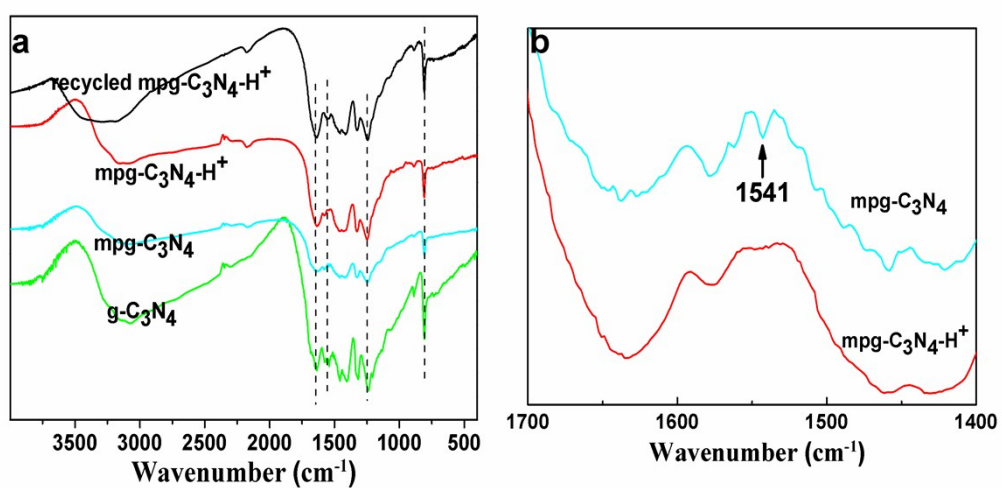

Fig. S2. FT-IR spectra.

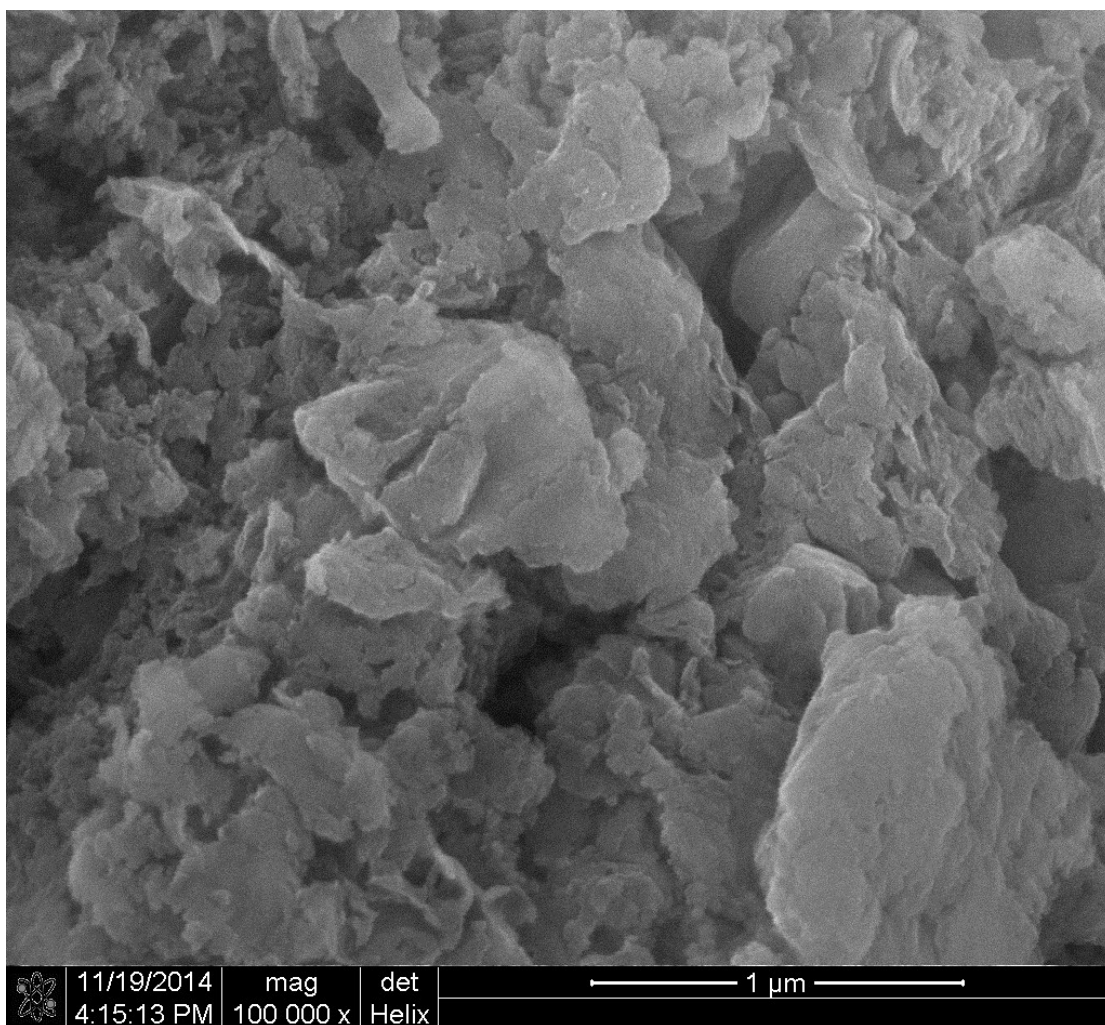

**Fig. S3.** SEM images of the bulk g-C<sub>3</sub>N<sub>4</sub>.

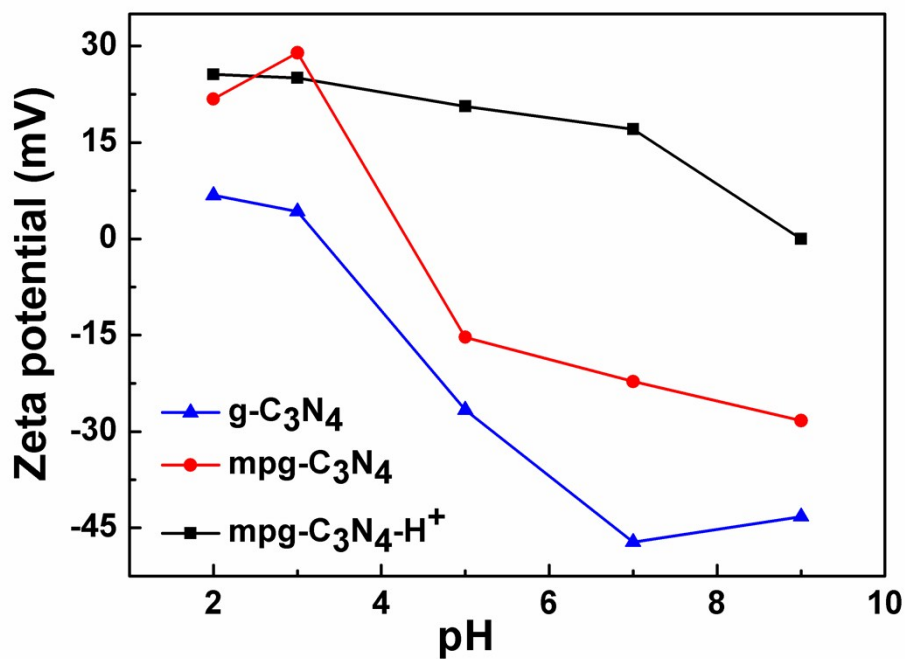

Fig. S4. Zeta potential of the adsorbent (0.15 mg/mL) at 30 °C.

Table S1. Kinetic parameters for adsorption of MCs on mpg-C<sub>3</sub>N<sub>4</sub>-H<sup>+</sup> at 30 °C.

|       |              | Pseudo-first-order kinetic model |               |        |
|-------|--------------|----------------------------------|---------------|--------|
|       | $C_0$ /(ppb) | $q_e^{(cal)}$<br>/ (ug/g)        | $k_1$ /(/min) | $R^2$  |
| MC-LR | 50           | 26.59                            | 2.59E-03      | 0.6450 |
|       | 100          | 76.68                            | 2.54E-03      | 0.7797 |
|       | 200          | 91.19                            | 3.31E-03      | 0.6618 |
| MC-RR | 50           | 0.67                             | 5.43E-03      | 0.3172 |
|       | 100          | 36.40                            | 2.18E-03      | 0.1562 |
|       | 200          | 132.72                           | 2.54E-03      | 0.2106 |

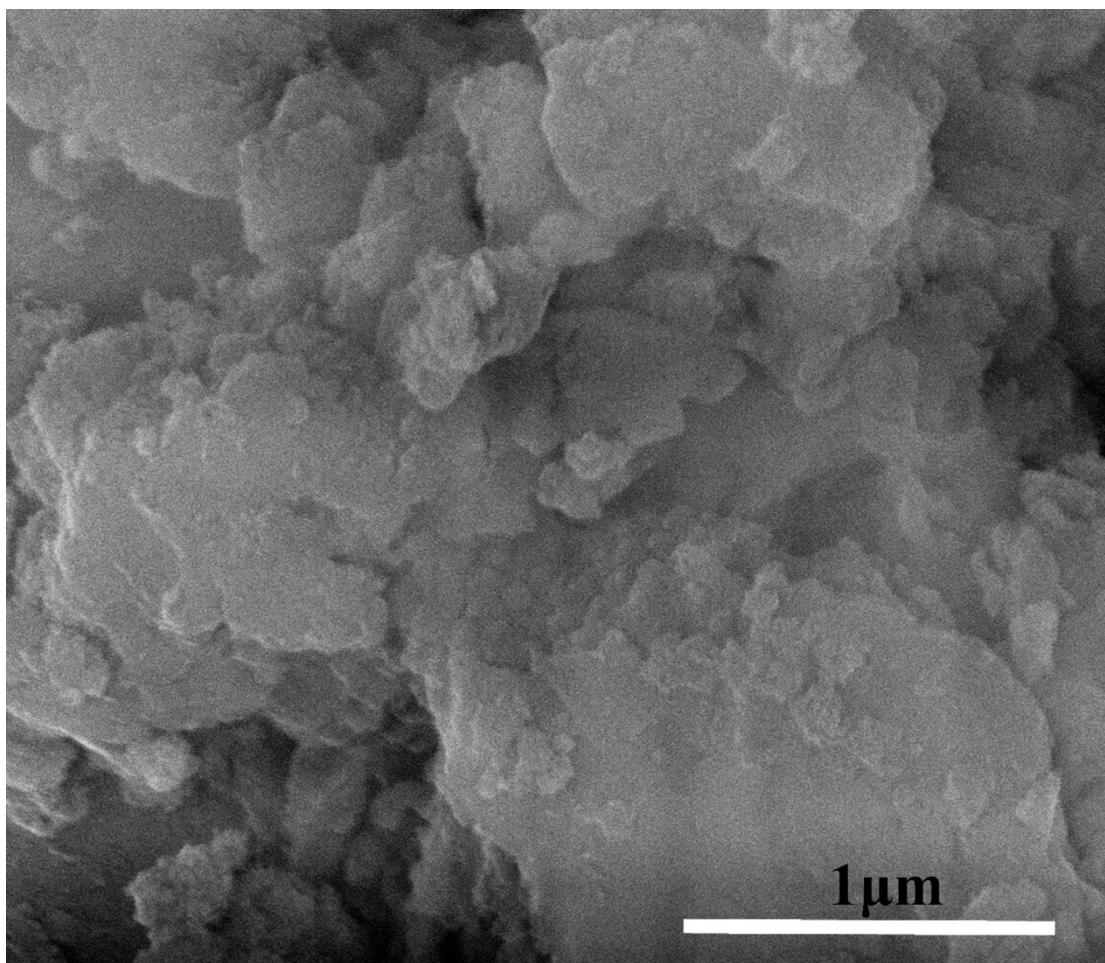

**Fig. S5.** SEM images of the recycled mpg-C<sub>3</sub>N<sub>4</sub>-H<sup>+</sup>.

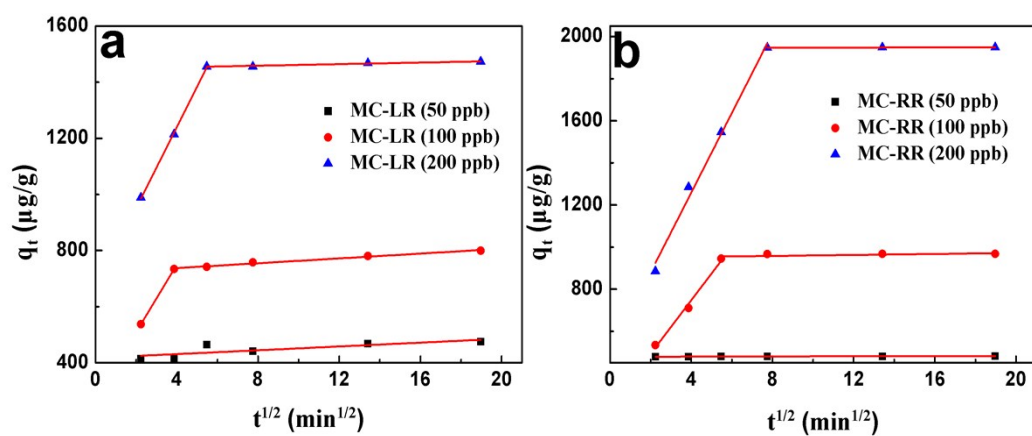

**Fig. S6.** Intraparticle diffusion plot for the adsorption of MCs on mpg-C<sub>3</sub>N<sub>4</sub>-H<sup>+</sup> (0.1mg) with different initial concentrations of MCs at 30 °C; pH 7.0.

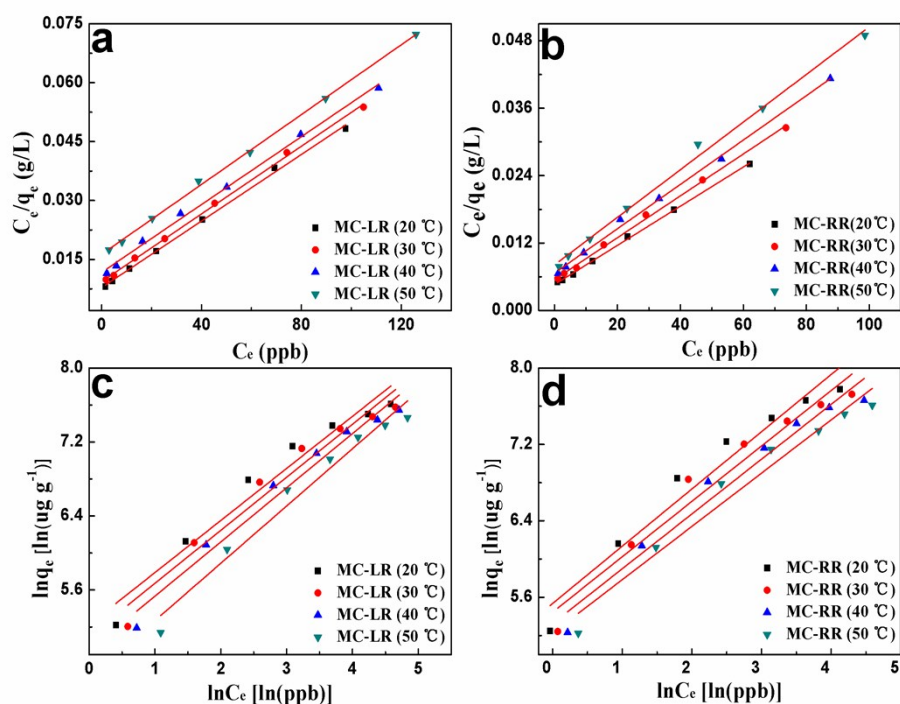

**Fig. S7.** (a) Langmuir plots of the isotherms; (b) Langmuir plots of the isotherms; (c) Freundlich plots of the isotherms; (d) Freundlich plots of the isotherms.

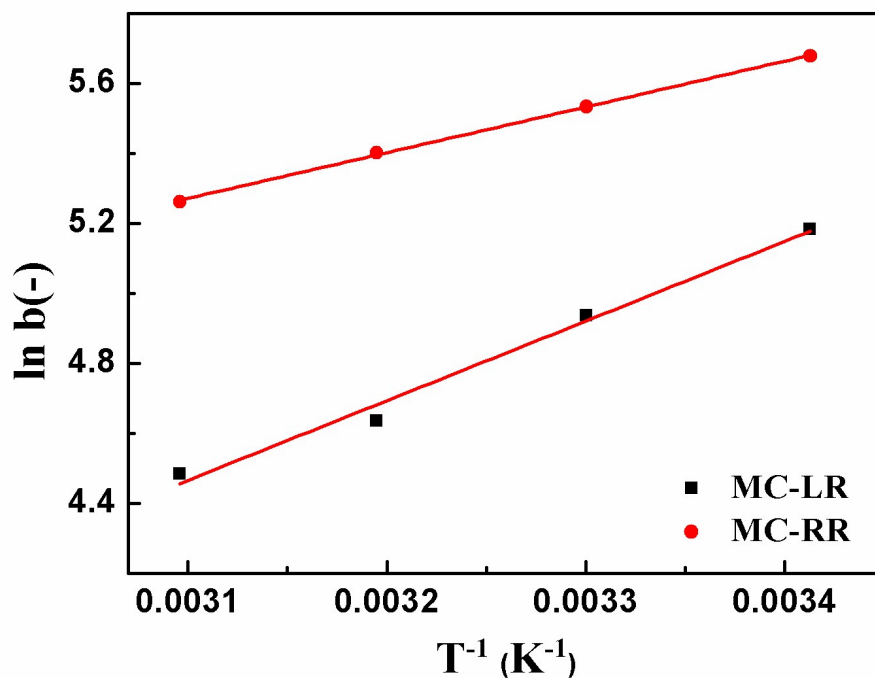

**Fig. S8.** Van't Hoff plot of the Langmuir constants  $b$  as a function of temperature, used to calculate the  $\Delta H$  and  $\Delta S$  of the MCs adsorption over mpg- $C_3N_4-H^+$ .

**Table S2. Maximum adsorption capacity of MCs on various adsorbents**

| Adsorbent                                                | Q <sub>max</sub> (MC-LR) | Q <sub>max</sub> (MC-RR) | Reference |
|----------------------------------------------------------|--------------------------|--------------------------|-----------|
| Ordered mesoporous carbons                               | 526 mg/g                 | —— <sup>a</sup>          | S1        |
| magnetic mesoporous carbon                               | 220 mg/g                 | 180 mg/g                 | S2        |
| carbon nanotubes                                         | 14.8 mg/g                | 5.9 mg/g                 | S3        |
| MIL-100(Al) gels                                         | 9007 µg/g                | —— <sup>a</sup>          | S4        |
| mpg-C <sub>3</sub> N <sub>4</sub> -H <sup>+</sup>        | 2360.96 µg/g             | 2868.78 µg/g             | this work |
| Graphene oxide                                           | 1700 µg/g                | 1878 µg/g                | S5        |
| commercial activated carbon                              | 1481.7 µg/g              | 1034.1 µg/g              | S5        |
| Fe <sub>3</sub> O <sub>4</sub> @copper silicate nanotube | 500 µg/g                 | —— <sup>a</sup>          | S6        |
| peat                                                     | 255.7 µg/g               | —— <sup>a</sup>          | S7        |
| Cu <sup>2+</sup> -immobilized magnetite nanoparticles    | 60 µg/g                  | —— <sup>a</sup>          | S8        |

——<sup>a</sup>, not determined.

## References

- S1. W. Teng, Z. Wu, J. Fan, H. Chen, D. Feng, Y. Lv, J. Wang, A. M. Asiri and D. Zhao, *Energy & Environmental Science*, 2013, 6, 2765-2776.
- S2. X. Zhang and L. Jiang, *Journal of Materials Chemistry*, 2011, 21, 10653-10657.
- S3. H. Yan, A. Gong, H. He, J. Zhou, Y. Wei and L. Lv, *Chemosphere*, 2006, 62, 142-148.
- S4. W. Xia, X. Zhang, L. Xu, Y. Wang, J. Lin and R. Zou, *RSC Advances*, 2013, 3, 11007-11013.
- S5. S. Pavagadhi, A. L. L. Tang, M. Sathishkumar, K. P. Loh and R. Balasubramanian, *water research*, 2013, 47, 4621-4629.
- S6. H. Chen, X. Lu, C. Deng and X. Yan, *The Journal of Physical Chemistry C*, 2009, 113, 21068-21073.
- S7. M. Sathishkumar, S. Pavagadhi, K. Vijayaraghavan, R. Balasubramanian and S. Ong, *Journal of hazardous materials*, 2010, 184, 417-424.
- S8. M. Gao, C. Deng, Z. Fan, N. Yao, X. Xu, P. Yang and X. Zhang, *Small*, 2007, 3, 1714-1717.
